# Supplementary material
Source: HighWire-hosted journal article supplement (https://adc.bmj.com/content/103/2/149)
Supplement: inline-supplementary-material-2 [file inline-supplementary-material-2.docx]

APPENDIX 2 – ICPC codes for musculoskeletal complaints

L01 Neck symptom/complain

L02 Back symptom/complaint

L03 Low back symptom/complaint

L04 Chest symptom/complaint

L05 Flank/axilla symptom/complaint

L07 Jaw symptom/complaint

L08 Shoulder symptom/complaint

L09 Arm symptom/complaint

L10 Elbow symptom/complaint

L11 Wrist symptom/complaint

L12 Hand/finger symptom/complaint

L13 Hip symptom/complaint

L14 Leg/thigh symptom/complaint

L15 Knee symptom/complaint

L16 Ankle symptom/complaint

L17 Foot/toe symptom/complaint

L18 Muscle pain

L19 Muscle symptom/complaint NOS

L20 Joint symptom/complaint NOS

L26 Fear of cancer musculoskeletal

L27 Fear musculoskeletal disease other

L28 Limited function/disability (l)

L29 Sympt/complt. Musculoskeletal other

L70 Infections musculoskeletal system

L71 Malignant neoplasm musculoskeletal

L72 Fracture: radius/ulna

L73 Fracture: tibia/fibula

L74 Fracture: hand/foot bone

L75 Fracture: femur

L76 Fracture: other

L77 Sprain/strain of ankle

L78 Sprain/strain of knee

L79 Sprain/strain of joint NOS

L80 Dislocation/subluxation

L81 Injury musculoskeletal NOS

L82 Congenital anomaly musculoskeletal

L83 Neck syndrome

L84 Back syndrome w/o radiating pain

L85 Acquired deformity of spine

L86 Back syndrome with radiating pain

L87 Bursitis/tendinitis/synovitis NOS

L88 Rheumatoid/seropositive arthritis

L89 Osteoarthrosis of hip

L90 Osteoarthrosis of knee

L91 Osteoarthrosis other

L92 Shoulder syndrome

L93 Tennis elbow

L94 Osteochondrosis

L95 Osteoporosis

L96 Acute internal damage knee

L97 Neoplasm benign/unspec musculo.

L98 Acquired deformity of limb

L99 Musculoskeletal disease, other
